# Supplementary material for: The rate of transient beta frequency events predicts behavior across tasks and species
Source: eLife journal article supplement (doi:10.7554/elife.29086), 2017-11-06
Supplement: supp [file elife-29086-supp-v1.zip]

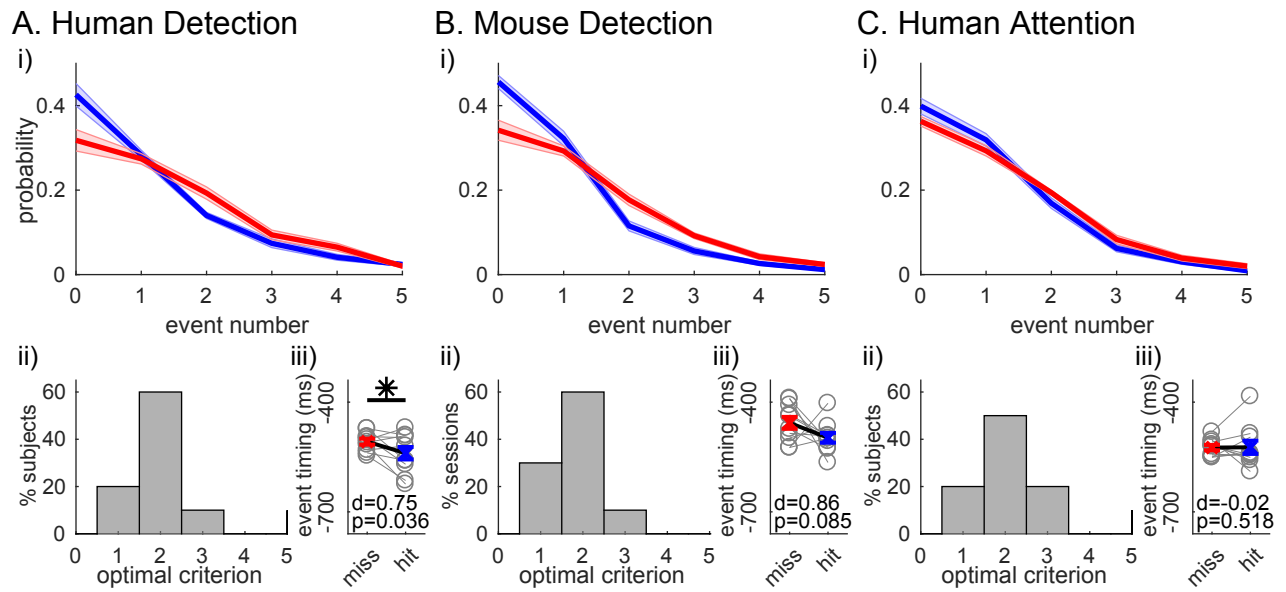

**D.**

| Cohen's d for proportion of trials | Human detection<br>Miss - Hit | Mouse detection<br>Miss - Hit | Human attention<br>Out - In |
|------------------------------------|-------------------------------|-------------------------------|-----------------------------|
| ≥1 events                          | 1.32                          | 1.81                          | 0.74                        |
| ≥2 events                          | 1.38                          | 2.16                          | 1.08                        |
| 0 events                           | -1.32                         | -1.81                         | -0.74                       |
| 1 events                           | -0.24                         | -0.63                         | -0.61                       |

Figure 7 - figure supplement 2
