# Supplementary figures and images for: The rate of transient beta frequency events predicts behavior across tasks and species
Source: eLife journal article supplement (doi:10.7554/elife.29086), 2017-11-06

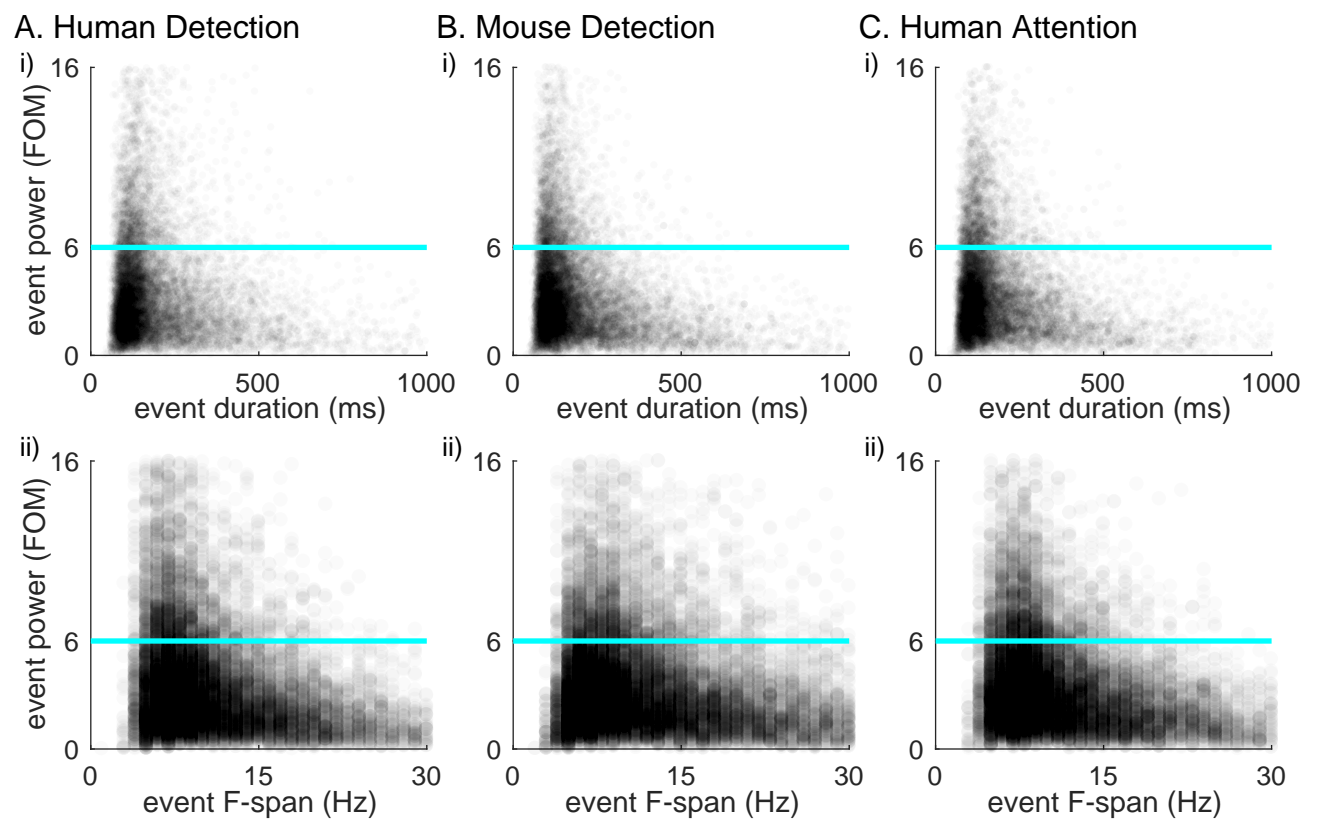

Figure 5 - figure supplement 1

Supplement: supp [file elife-29086-supp-v1.zip]

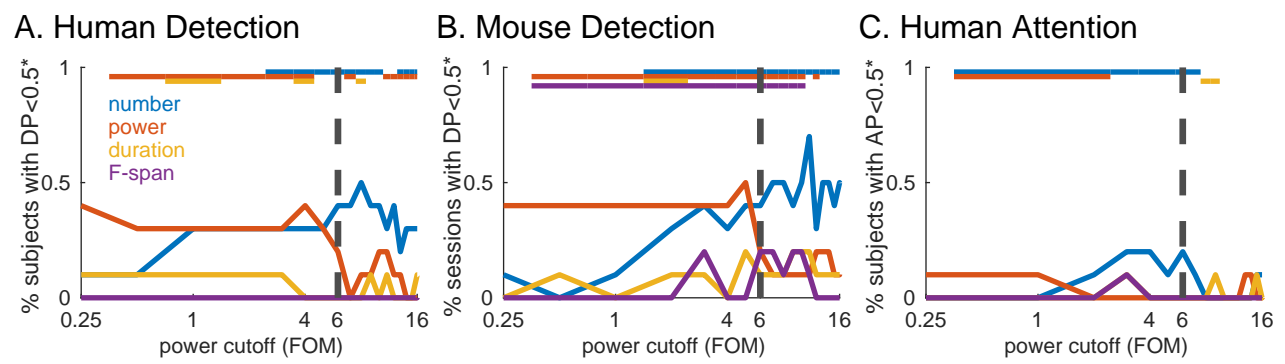

Figure 7 - figure supplement 1

Supplement: supp [file elife-29086-supp-v1.zip]

### A. Human Detection

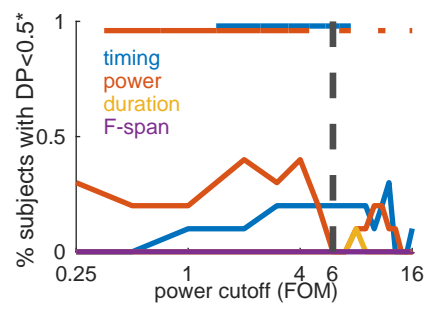

### B. Mouse Detection

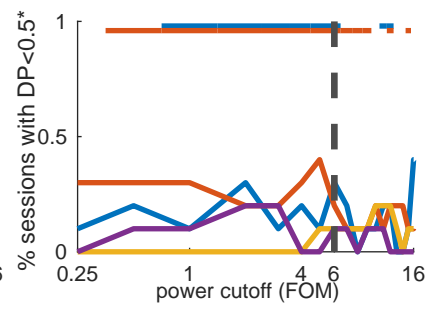

Figure 8 - figure supplement 1

Supplement: supp [file elife-29086-supp-v1.zip]

## A. Evoked Response

i) Human MEG

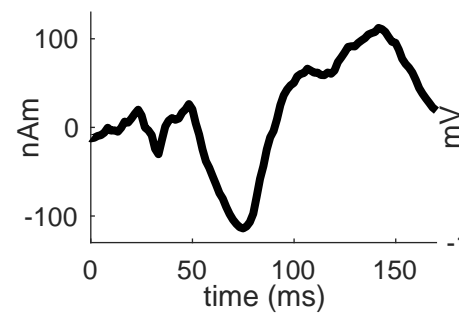

ii) Mouse LFP

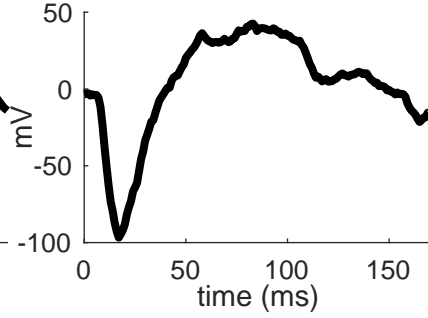

## B. Mouse Catch Trials

i)

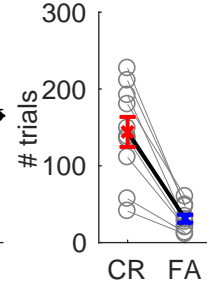

ii)

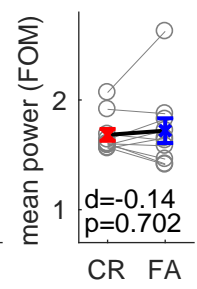

Figure 1 - figure supplement 1

Supplement: supp [file elife-29086-supp-v1.zip]

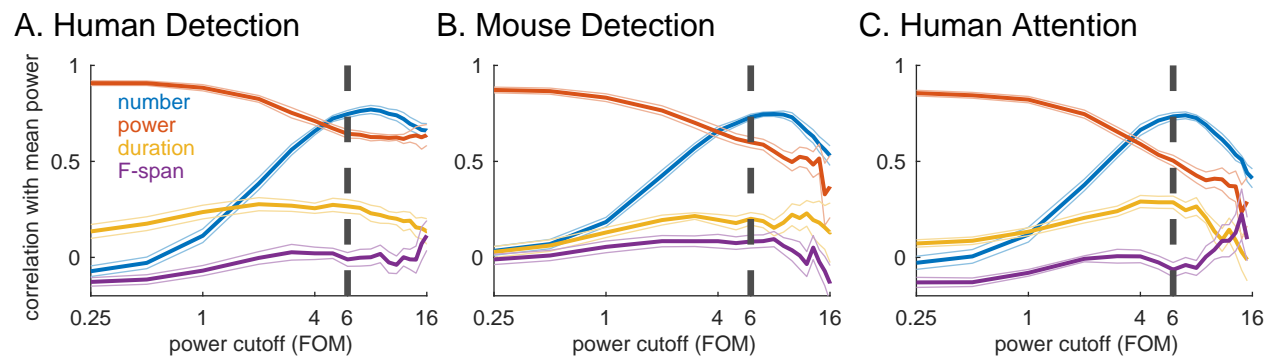

Figure 6 - figure supplement 2

Supplement: supp [file elife-29086-supp-v1.zip]

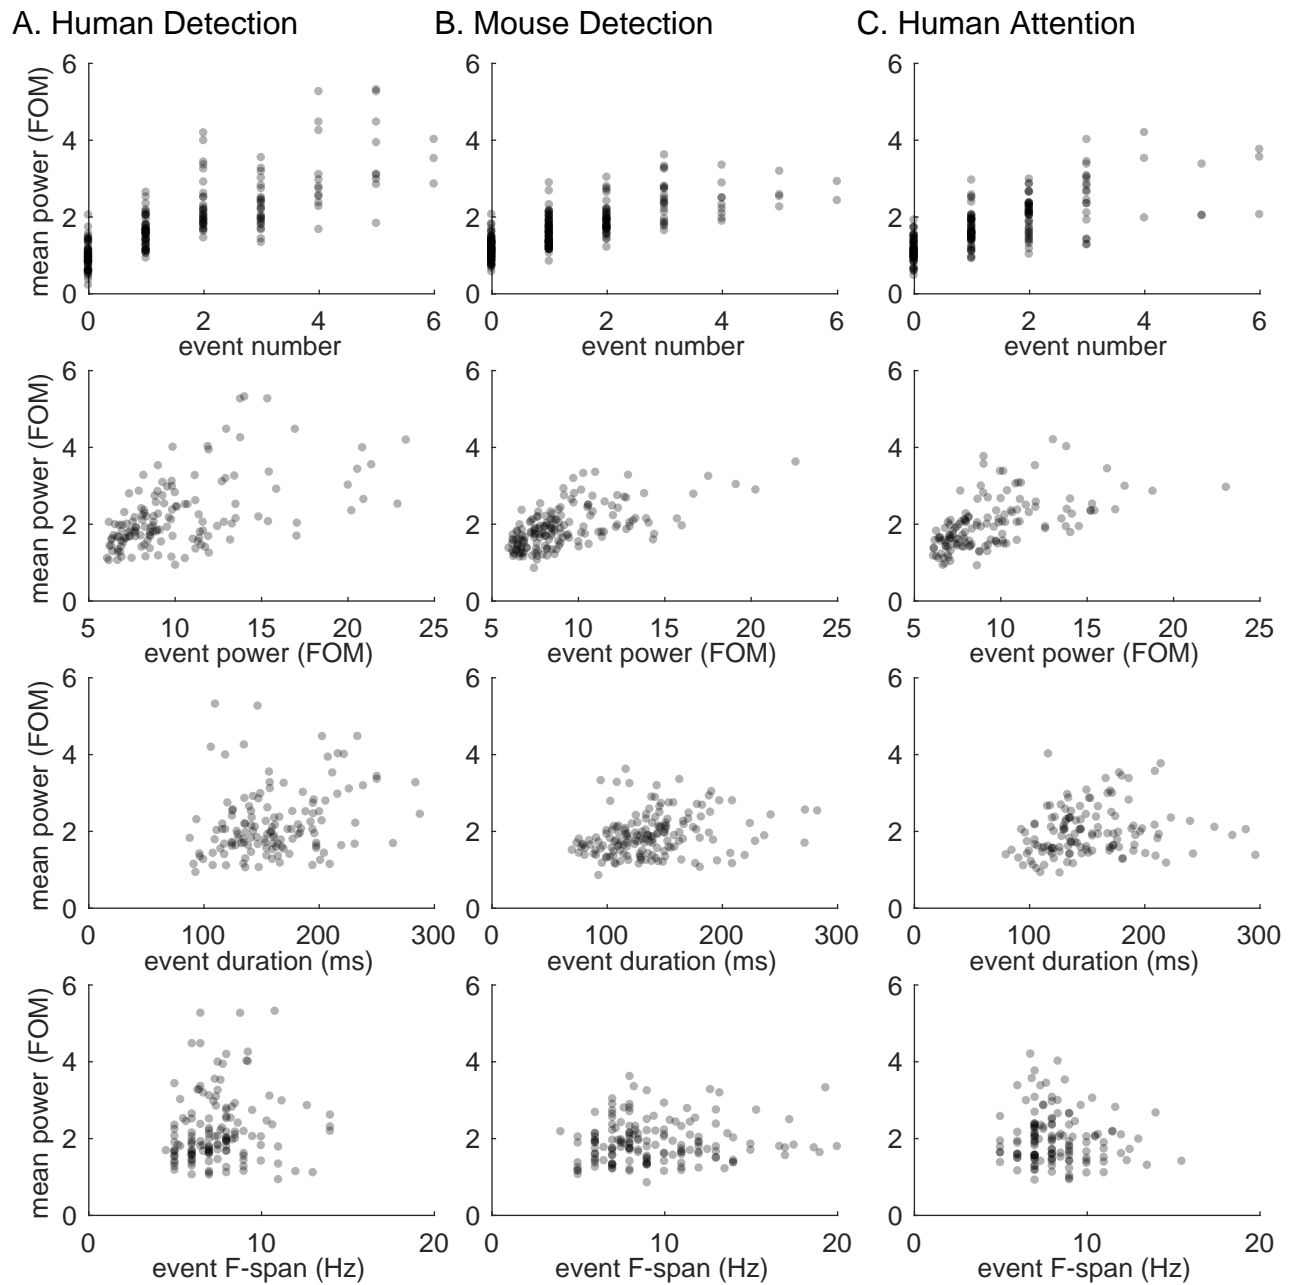

Figure 6 - figure supplement 1

Supplement: supp [file elife-29086-supp-v1.zip]
